# Supplementary material for: Comparison of Behavior and Space Use of the European Bullhead Cottus gobio and the Round Goby Neogobius melanostomus in a Simulated Natural Habitat
Source: MDPI journal article supplement (doi:10.3390/biology10090821), 2021-08-24
Supplement: s1 [file s1]

Supplementary data 2.

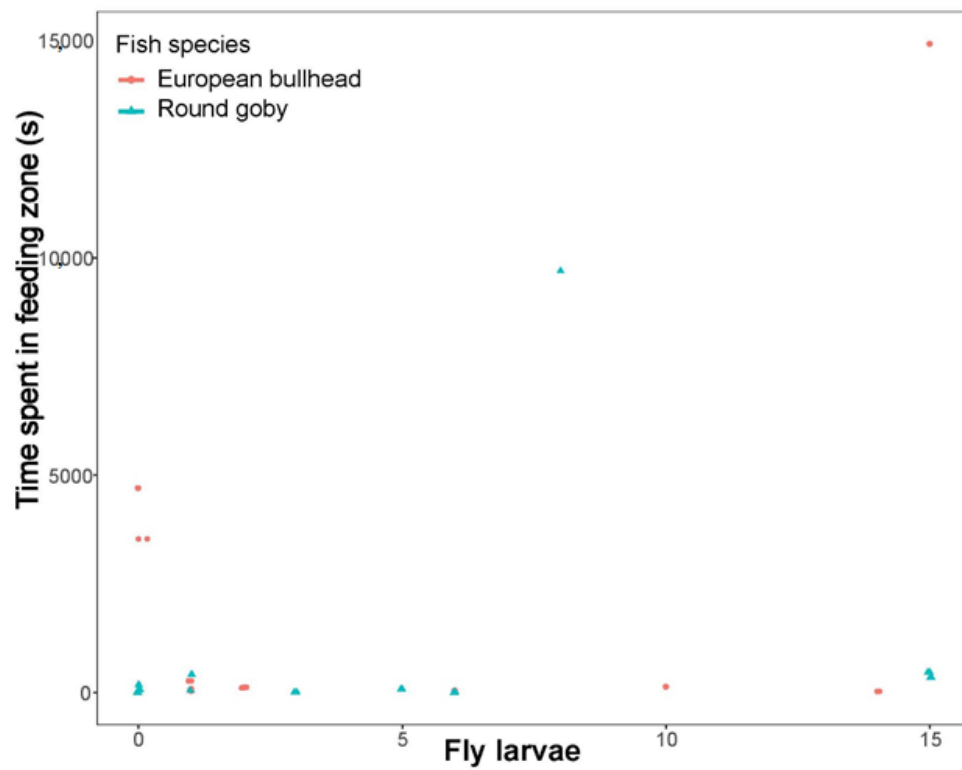

**Figure S1.** Simple linear relationship between number of fly larvae consumed and total time spent in feeding zone by round goby and European bullhead using the default *lm* function in the R statistical program (R Core Team, 2020).
