# Supplementary material for: Comparison of Behavior and Space Use of the European Bullhead Cottus gobio and the Round Goby Neogobius melanostomus in a Simulated Natural Habitat
Source: MDPI journal article supplement (doi:10.3390/biology10090821), 2021-08-24
Supplement: s1 [file s1]

Supplementary material 1.

**Table S1.** The mean values measured at 20 water velocity points (WV in m sec<sup>-1</sup> measurement points MP (A1-H1) in all three (1-3) experimental channels (EC). Data are mean  $\pm$  SD.

| EC | MP | WV              |
|----|----|-----------------|----|-----------------|----|-----------------|----|-----------------|----|-----------------|----|-----------------|----|-----------------|----|-----------------|
| 1  | A1 | 0.78 $\pm$ 0.05 | B1 | 0.20 $\pm$ 0.08 | C1 | 0.23 $\pm$ 0.06 | D1 | 0.53 $\pm$ 0.04 | E1 | 0.56 $\pm$ 0.04 | F1 | 0.03 $\pm$ 0.03 | G1 | 0.11 $\pm$ 0.04 | H1 | 0.21 $\pm$ 0.04 |
|    | A2 | 0.10 $\pm$ 0.03 | B2 | 0.32 $\pm$ 0.05 | C2 | 0.31 $\pm$ 0.06 |    |                 |    |                 | F2 | 0.33 $\pm$ 0.10 | G2 | 0.32 $\pm$ 0.03 | H2 | 0.36 $\pm$ 0.04 |
|    | A3 | 0.82 $\pm$ 0.06 | B3 | 0.34 $\pm$ 0.06 | C3 | 0.30 $\pm$ 0.04 |    |                 |    |                 | F3 | 0.56 $\pm$ 0.03 | G3 | 0.46 $\pm$ 0.04 | H3 | 0.35 $\pm$ 0.06 |
| 2  | A1 | 0.79 $\pm$ 0.04 | B1 | 0.34 $\pm$ 0.04 | C1 | 0.28 $\pm$ 0.03 | D1 | 0.55 $\pm$ 0.04 | E1 | 0.59 $\pm$ 0.02 | F1 | 0.02 $\pm$ 0.02 | G1 | 0.12 $\pm$ 0.04 | H1 | 0.18 $\pm$ 0.04 |
|    | A2 | 0.15 $\pm$ 0.05 | B2 | 0.25 $\pm$ 0.04 | C2 | 0.31 $\pm$ 0.02 |    |                 |    |                 | F2 | 0.42 $\pm$ 0.11 | G2 | 0.36 $\pm$ 0.07 | H2 | 0.33 $\pm$ 0.04 |
|    | A3 | 0.89 $\pm$ 0.06 | B3 | 0.40 $\pm$ 0.08 | C3 | 0.30 $\pm$ 0.05 |    |                 |    |                 | F3 | 0.56 $\pm$ 0.04 | G3 | 0.40 $\pm$ 0.02 | H3 | 0.31 $\pm$ 0.03 |
| 3  | A1 | 0.81 $\pm$ 0.05 | B1 | 0.26 $\pm$ 0.04 | C1 | 0.26 $\pm$ 0.03 | D1 | 0.52 $\pm$ 0.04 | E1 | 0.58 $\pm$ 0.02 | F1 | 0.01 $\pm$ 0.01 | G1 | 0.14 $\pm$ 0.04 | H1 | 0.20 $\pm$ 0.04 |
|    | A2 | 0.08 $\pm$ 0.03 | B2 | 0.32 $\pm$ 0.03 | C2 | 0.33 $\pm$ 0.04 |    |                 |    |                 | F2 | 0.41 $\pm$ 0.11 | G2 | 0.39 $\pm$ 0.05 | H2 | 0.35 $\pm$ 0.03 |
|    | A3 | 0.86 $\pm$ 0.05 | B3 | 0.35 $\pm$ 0.04 | C3 | 0.29 $\pm$ 0.06 |    |                 |    |                 | F3 | 0.58 $\pm$ 0.02 | G3 | 0.43 $\pm$ 0.08 | H3 | 0.33 $\pm$ 0.04 |
